# Supplementary material for: Kestose supplementation exerts bifidogenic effect within fecal microbiota and increases fecal butyrate concentration in dogs
Source: PubMed Central journal article supplement — J Vet Med Sci. 2019 Nov 25;82(1):1–8. doi: 10.1292/jvms.19-0071 (PMC6983673; doi:10.1292/jvms.19-0071), 2019-11-25
Supplement: jvms-82-001-s001.pdf [file jvms-82-001-s001.pdf]

Table S1. Range and median of relative abundance of each bacterial taxa

| Phylum               | Median occupancy (%) |                   |                   |                   |
|----------------------|----------------------|-------------------|-------------------|-------------------|
|                      | Week 0               | Week 4            | Week 8            | Week 12           |
| Firmicutes           | 67.25                | 78.06             | 66.61             | 70.50             |
|                      | ( 56.80 - 79.51 )    | ( 52.43 - 87.44 ) | ( 44.03 - 90.02 ) | ( 61.38 - 94.03 ) |
| Actinobacteria       | 4.03                 | 6.39#             | 9.70 #            | 6.58              |
|                      | ( 1.75 - 5.91 )      | ( 1.99 - 10.87 )  | ( 3.29 - 13.38 )  | ( 3.00 - 9.55 )   |
| Fusobacteria         | 6.92                 | 1.48#             | 1.38#             | 2.28              |
|                      | ( 1.54 - 11.29 )     | ( 0.55 - 8.22 )   | ( 0.75 - 5.27 )   | ( 0.02 - 4.59 )   |
| Bacteroidetes        | 4.10                 | 2.26              | 2.66              | 0.79*             |
|                      | ( 1.14 - 5.07 )      | ( 0.84 - 6.38 )   | ( 0.68 - 3.54 )   | ( 0.00 - 0.81 )   |
| Proteobacteria       | 2.16                 | 1.27              | 0.88              | 0.40              |
|                      | ( 0.62 - 3.72 )      | ( 0.25 - 5.54 )   | ( 0.25 - 2.40 )   | ( 0.02 - 2.28 )   |
| Tenericutes          | 0.00                 | 0.00              | 0.00              | 0.00              |
|                      | ( 0.00 - 0.00 )      | ( 0.00 - 0.00 )   | ( 0.00 - 0.00 )   | ( 0.00 - 0.00 )   |
| Rejected hit †       | 15.54                | 10.54             | 18.77             | 19.45             |
|                      | ( 9.28 - 22.14 )     | ( 6.81 - 28.18 )  | ( 4.11 - 34.10 )  | ( 2.93 - 30.41 )  |
| Genus §              | Week 0               | Week 4            | Week 8            | Week 12           |
| Lactobacillus        | 39.14                | 49.04             | 45.65             | 46.49             |
|                      | ( 10.79 - 47.51 )    | ( 19.22 - 68.46 ) | ( 9.51 - 60.79 )  | ( 34.58 - 75.80 ) |
| Blautia              | 11.84                | 12.29             | 8.65              | 9.55              |
|                      | ( 10.61 - 21.55 )    | ( 5.58 - 13.34 )  | ( 7.62 - 10.69 )  | ( 7.17 - 14.89 )  |
| Peptoclostridium     | 4.49                 | 5.42              | 4.11              | 5.26              |
|                      | ( 3.55 - 8.61 )      | ( 1.98 - 8.33 )   | ( 3.91 - 5.34 )   | ( 2.60 - 7.39 )   |
| Bifidobacterium      | 0.63                 | 4.19#             | 7.64#             | 5.83              |
|                      | ( 0.01 - 4.82 )      | ( 0.25 - 9.73 )   | ( 1.85 - 11.75 )  | ( 2.21 - 8.42 )   |
| Romboutsia           | 3.11                 | 4.03              | 1.43              | 2.88              |
|                      | ( 0.25 - 14.41 )     | ( 0.38 - 6.87 )   | ( 0.34 - 10.66 )  | ( 1.69 - 10.09 )  |
| Fusobacterium        | 7.42                 | 1.53#             | 1.44#             | 2.41              |
|                      | ( 1.54 - 11.29 )     | ( 0.55 - 8.22 )   | ( 0.75 - 5.27 )   | ( 0.02 - 4.59 )   |
| Streptococcus        | 1.54                 | 1.70              | 1.29              | 0.07              |
|                      | ( 0.05 - 3.31 )      | ( 0.00 - 7.06 )   | ( 0.00 - 18.13 )  | ( 0.00 - 1.03 )   |
| Prevotella           | 2.24                 | 1.46              | 1.78              | 0.59*             |
|                      | ( 0.57 - 4.20 )      | ( 0.22 - 5.60 )   | ( 0.31 - 2.73 )   | ( 0.00 - 0.64 )   |
| Enterococcus         | 1.19                 | 1.00              | 0.73              | 0.39              |
|                      | ( 0.04 - 4.56 )      | ( 0.01 - 5.17 )   | ( 0.11 - 3.51 )   | ( 0.00 - 3.67 )   |
| Clostridium          | 0.89                 | 0.81              | 0.42              | 1.25              |
|                      | ( 0.62 - 7.44 )      | ( 0.01 - 1.73 )   | ( 0.12 - 4.30 )   | ( 0.01 - 1.61 )   |
| Collinsella          | 1.83                 | 1.49              | 1.37              | 0.96              |
|                      | ( 0.74 - 3.03 )      | ( 0.81 - 1.96 )   | ( 0.72 - 2.21 )   | ( 0.59 - 0.98 )   |
| Faecalibacterium     | 2.01                 | 1.14              | 1.16              | 0.85              |
|                      | ( 1.18 - 3.00 )      | ( 0.73 - 1.18 )   | ( 0.43 - 1.75 )   | ( 0.01 - 1.71 )   |
| Achnoclostridium     | 0.97                 | 1.05              | 1.00              | 0.73              |
|                      | ( 0.68 - 1.87 )      | ( 0.70 - 1.49 )   | ( 0.41 - 1.81 )   | ( 0.41 - 1.10 )   |
| Megamonas            | 1.15                 | 0.43              | 0.58              | 0.02*             |
|                      | ( 0.17 - 4.05 )      | ( 0.22 - 1.26 )   | ( 0.20 - 1.70 )   | ( 0.00 - 0.49 )   |
| Bacteroides          | 0.71                 | 0.69              | 0.60              | 0.17*             |
|                      | ( 0.33 - 2.07 )      | ( 0.42 - 0.74 )   | ( 0.37 - 1.80 )   | ( 0.00 - 0.28 )   |
| Parasutterella       | 0.16                 | 0.68              | 0.56              | 0.17              |
|                      | ( 0.00 - 1.96 )      | ( 0.00 - 2.61 )   | ( 0.01 - 2.06 )   | ( 0.00 - 0.43 )   |
| Anaerobiospirillum   | 0.36                 | 0.01              | 0.00              | 0.01              |
|                      | ( 0.00 - 1.41 )      | ( 0.00 - 3.77 )   | ( 0.00 - 0.28 )   | ( 0.00 - 1.40 )   |
| Ruminococcus         | 0.44                 | 0.41              | 0.39              | 0.48              |
|                      | ( 0.19 - 0.82 )      | ( 0.21 - 0.57 )   | ( 0.20 - 0.77 )   | ( 0.10 - 0.72 )   |
| Ascolactobacterium   | 0.42                 | 0.33              | 0.52              | 0.11              |
|                      | ( 0.10 - 0.97 )      | ( 0.27 - 1.04 )   | ( 0.08 - 1.01 )   | ( 0.01 - 0.26 )   |
| Asipilatoclostridium | 0.33                 | 0.22              | 0.30              | 0.38              |
|                      | ( 0.15 - 0.76 )      | ( 0.17 - 0.54 )   | ( 0.13 - 0.39 )   | ( 0.17 - 0.43 )   |
| Allobaculum          | 0.55                 | 0.25              | 0.11              | 0.33              |
|                      | ( 0.00 - 1.08 )      | ( 0.03 - 0.37 )   | ( 0.09 - 0.22 )   | ( 0.04 - 0.52 )   |
| Terrisporobacter     | 0.12                 | 0.09              | 0.04              | 0.02              |
|                      | ( 0.00 - 2.91 )      | ( 0.00 - 0.27 )   | ( 0.00 - 0.24 )   | ( 0.01 - 0.44 )   |
| Escherichia          | 0.40                 | 0.05              | 0.00              | 0.00              |
|                      | ( 0.00 - 1.83 )      | ( 0.00 - 0.20 )   | ( 0.00 - 0.54 )   | ( 0.00 - 0.09 )   |
| Slackia              | 0.29                 | 0.20              | 0.15              | 0.15              |
|                      | ( 0.17 - 0.64 )      | ( 0.05 - 0.36 )   | ( 0.05 - 0.17 )   | ( 0.10 - 0.36 )   |
| Sutterella           | 0.25                 | 0.10              | 0.09              | 0.02              |
|                      | ( 0.07 - 0.94 )      | ( 0.03 - 0.20 )   | ( 0.01 - 0.15 )   | ( 0.00 - 0.07 )   |
| Turicibacter         | 0.27                 | 0.02              | 0.04              | 0.02              |
|                      | ( 0.00 - 0.51 )      | ( 0.00 - 0.21 )   | ( 0.00 - 0.53 )   | ( 0.00 - 0.31 )   |
| Helicobacter         | 0.06                 | 0.05              | 0.03              | 0.01              |
|                      | ( 0.00 - 0.20 )      | ( 0.01 - 0.40 )   | ( 0.00 - 0.20 )   | ( 0.00 - 0.45 )   |
| Butyricoccus         | 0.11                 | 0.12              | 0.10              | 0.05*             |
|                      | ( 0.07 - 0.12 )      | ( 0.09 - 0.18 )   | ( 0.08 - 0.17 )   | ( 0.01 - 0.12 )   |
| Lactonifactor        | 0.09                 | 0.05              | 0.04              | 0.04              |
|                      | ( 0.05 - 0.24 )      | ( 0.02 - 0.13 )   | ( 0.02 - 0.11 )   | ( 0.01 - 0.22 )   |
| Campylobacter        | 0.11                 | 0.04              | 0.01              | 0.00              |
|                      | ( 0.00 - 0.17 )      | ( 0.00 - 0.57 )   | ( 0.00 - 0.06 )   | ( 0.00 - 0.13 )   |
| Catenibacterium      | 0.04                 | 0.02              | 0.03              | 0.01              |
|                      | ( 0.02 - 0.42 )      | ( 0.00 - 0.18 )   | ( 0.01 - 0.08 )   | ( 0.00 - 0.15 )   |
| Adlercreutzia        | 0.06                 | 0.06              | 0.07              | 0.07              |
|                      | ( 0.00 - 0.08 )      | ( 0.01 - 0.10 )   | ( 0.02 - 0.09 )   | ( 0.04 - 0.10 )   |

#  $p < 0.1$  vs. 0 weeks\*  $p < 0.05$  vs. 8 weeks

† Rejected hit include those whose sequences shared less than 97% homology to any species listed in TechnoSuruga Lab Microbial Identification database DB-BA 10 (TechnoSuruga Laboratory, Shizuoka, Japan).

§ Genus whose median occupancy exceeded 0.1% are listed.
